# Supplementary material for: Biochar and Rhizobacteria Amendments Improve Several Soil Properties and Bacterial Diversity
Source: PubMed Central journal article supplement (PMC7232174; doi:10.3390/microorganisms8040502), 2020-04-01
Supplement: microorganisms-08-00502-s001.pdf [file microorganisms-08-00502-s001.pdf]

**Equation S1:**

$$\text{Schao1} = S_{\text{obs}} + \frac{n_1(n_1-1)}{2(n_2+1)}$$

Where  $S_{\text{chao1}}$  is the estimated number of OTU,  $S_{\text{obs}}$  is the number of OTU from actual observation,  $n_1$  is the number of OTU with only one sequence (i.e. singletons),  $n_2$  is the number of OTU with two sequences (i.e. doubletons).

**Equations S2,S3,S4,S5:**

$$S_{\text{ACE}} = \begin{cases} S_{\text{abund}} + \frac{S_{\text{rare}}}{C_{\text{ACE}}} + \frac{n_1}{C_{\text{ACE}}} \hat{\gamma}_{\text{ACE}}^2, & \text{for } \hat{\gamma}_{\text{ACE}} < 0.80 \\ S_{\text{abund}} + \frac{S_{\text{rare}}}{C_{\text{ACE}}} + \frac{n_1}{C_{\text{ACE}}} \tilde{\gamma}_{\text{ACE}}^2, & \text{for } \hat{\gamma}_{\text{ACE}} \geq 0.80 \end{cases}$$

$$N_{\text{rare}} = \sum_{i=1}^{\text{abund}} i n_i, \quad C_{\text{ACE}} = 1 - \frac{n_1}{N_{\text{rare}}}$$

$$\hat{\gamma}_{\text{ACE}}^2 = \max \left[ \frac{S_{\text{rare}}}{C_{\text{ACE}}} \frac{\sum_{i=1}^{\text{abund}} i(i-1)n_i}{N_{\text{rare}}(N_{\text{rare}}-1)} - 1, 0 \right]$$

$$\tilde{\gamma}_{\text{ACE}}^2 = \max \left[ \hat{\gamma}_{\text{ACE}}^2 \left\{ 1 + \frac{N_{\text{rare}}(1-C_{\text{ACE}}) \sum_{i=1}^{\text{abund}} i(i-1)n_i}{N_{\text{rare}}(N_{\text{rare}}-C_{\text{ACE}})} \right\}, 0 \right]$$

Where  $n_i$  is the number of OTU with  $i$  sequences,  $S_{\text{rare}}$  is the number of OTU with or less than "abund" sequences,  $S_{\text{abund}}$  is the number of OTU more than "abund" sequences, abund is the threshold of dominate OTU and default to be 10.

**Equation S6:**

$$D_{\text{simpson}} = \frac{\sum_{i=1}^{S_{\text{obs}}} n_i(n_i-1)}{N(N-1)}$$

Where  $S_{\text{obs}}$  is the number of OTU from actual observation,  $n_i$  is the number of sequences of  $i$ -th OTU,  $N$  is the number of all sequences.
